1 **Title:**

2 **Three-dose vaccination-induced immune responses protect against SARS-CoV-2**  
3 **Omicron-BA.2**

4 **Authors:** Runhong Zhou<sup>1,2,8</sup>, Na Liu<sup>1,2,6,8</sup>, Xin Li<sup>2,8</sup>, Qiaoli Peng<sup>1,2</sup>, Cheuk-Kwan  
5 Yiu<sup>3</sup>, Haode Huang<sup>1</sup>, Dawei Yang<sup>1</sup>, Zhenglong Du<sup>1</sup>, Hau-Yee Kwok<sup>1</sup>, Ka-Kit Au<sup>1</sup>,  
6 Jian-Piao Cai<sup>2</sup>, Ivan Fan-Ngai Hung<sup>3</sup>, Kelvin Kai-Wang To<sup>2,4</sup>, Xiaoning Xu<sup>7</sup>, Kwok-  
7 Yung Yuen<sup>2,4,5,6</sup>, Zhiwei Chen<sup>1,2,4,5,6,9\*</sup>

8 **Affiliations:**

9 <sup>1</sup>AIDS Institute, Li Ka Shing Faculty of Medicine, the University of Hong Kong;  
10 Pokfulam, Hong Kong Special Administrative Region, People's Republic of  
11 China.

12 <sup>2</sup>Department of Microbiology, Li Ka Shing Faculty of Medicine, the University of  
13 Hong Kong; Pokfulam, Hong Kong Special Administrative Region, People's  
14 Republic of China.

15 <sup>3</sup>Department of Medicine, Li Ka Shing Faculty of Medicine, The University of  
16 Hong Kong, Hong Kong SAR, People's Republic of China.

17 <sup>4</sup>State Key Laboratory for Emerging Infectious Diseases, the University of Hong  
18 Kong; Pokfulam, Hong Kong Special Administrative Region, People's Republic  
19 of China.

20 <sup>5</sup>Centre for Virology, Vaccinology and Therapeutics Limited, the University of  
21 Hong Kong, Hong Kong Special Administrative Region, People's Republic of  
22 China.

23 <sup>6</sup>Department of Clinical Microbiology and Infection Control, the University of  
24 Hong Kong-Shenzhen Hospital; Shenzhen, Guangdong, People's Republic of  
25 China.

26 <sup>7</sup>Centre for Immunology & Vaccinology, Chelsea and Westminster Hospital,  
27 Department of Medicine, Imperial College London, London, United Kingdom.

28 <sup>8</sup>These authors made equal contributions.

29 <sup>9</sup>Lead contact.

30

31 \*Correspondence: Zhiwei Chen, E-mail: [zchenai@hku.hk](mailto:zchenai@hku.hk), AIDS Institute and  
32 Department of Microbiology, Li Ka Shing Faculty of Medicine, the University of

33 Hong Kong, L5-45, 21 Sassoon Road, Pokfulam, Hong Kong SAR, People's  
34 Republic of China. Phone: 852-3917-9831; Fax: 852-3917-7805.

35

## 36 **Summary**

37 The ongoing outbreak of SARS-CoV-2 Omicron BA.2 infections in Hong Kong, the  
38 world model city of universal masking, has resulted in a major public health crisis. In  
39 this study, we investigate public servants who had been vaccinated with two dose  
40 (82.7%) or three dose (14%) of either CoronaVac (CorV) or BNT162b2 (BNT).  
41 During the BA.2 outbreak, 29.3% vaccinees were infected. Three-dose vaccination  
42 provided protection with lower incidence rates of breakthrough infections (2×BNT  
43 49.2% vs 3×BNT 16.6%,  $p<0.0001$ ; 2×CorV 48.6% vs 3×CoV 20.6%,  $p=0.003$ ). The  
44 third heterologous vaccination showed the lowest incidence (2×CorV+1×BNT 6.3%).  
45 Although BA.2 conferred the highest neutralization resistance compared with variants  
46 of concern tested, the third dose vaccination-activated spike-specific memory B and  
47 Omicron cross-reactive T cell responses contributed to reduced frequencies of  
48 breakthrough infection and disease severity. Our results have implications to timely  
49 boost vaccination and immune responses likely required for vaccine-mediated  
50 protection against Omicron BA.2 pandemic.

51

## 52 **Keywords**

53 SARS-CoV-2; The third dose vaccination; Omicron; BA.2; Breakthrough infection;  
54 BNT162b2; CoronaVac; Neutralizing antibody; T cell response

55

## 56 **Introduction**

57 To fight the ongoing SARS-CoV-2 pandemic, over 10 billion doses of COVID-19  
58 vaccines under emergency use authorization (EUA) have been administered globally,  
59 which has reduced the rates of hospitalization, disease severity and death significantly  
60 (Baden et al., 2021; Polack et al., 2020; Tanriover et al., 2021; Voysey et al., 2021;  
61 Xia et al., 2021). Unfortunately, the emergence of variants of concern (VOCs),  
62 especially the Omicron variants, have threatened the vaccine efficacy substantially  
63 (Abu-Raddad et al., 2021). We recently reported that significantly waned anti-  
64 Omicron neutralizing antibody and T cell responses especially among CoronaVac-  
65 vaccinees might pose a risk to vaccine-breakthrough infections in Hong Kong (Peng  
66 et al., 2022a). Although the third heterologous BNT162b2 vaccination after 2-dose  
67 CoronaVac generated high neutralizing antibody responses against ancestral and  
68 Omicron BA.1 than the third homologous CoronaVac booster (Cheng et al., 2022a;  
69 Perez-Then et al., 2022), vaccine efficacy and correlates of immune protection against

70 the major circulating Omicron BA.2 remains to be investigated (Cheng et al., 2022b;  
71 Sette and Crotty, 2021; Zhou et al., 2020).

72

### 73 **Results**

74 In our survey of 7247 public servants who work for Hong Kong government in  
75 January 2022 right before the Omicron BA.2 outbreak, 5995 (82.7%) and 1012 (14%)  
76 study subjects had received two and three doses of vaccinations, respectively,  
77 resulting in an overall vaccination rate of 96.7%. During the recent fifth wave of  
78 COVID-19 in Hong Kong since the end of January 2022 (Cheng et al., 2022b), 481  
79 (6.6%) subjects joined our follow-up study. These subjects had received 2-dose  
80 BNT162b2 (2×BNT, n=169), 3-dose BNT162b2 (3×BNT, n=175), 2-dose CoronaVac  
81 (2×CorV, n=37), 3-dose CoronaVac (3×CorV, n=68) or a heterologous booster dose of  
82 BNT162b2 after two prior doses of CoronaVac (2×CorV+1×BNT, n=32) (Table 1).  
83 Among these 481 subjects, a total of 141 (141/482, 29.3%) BA.2 infections were  
84 confirmed by governmental reverse transcriptase-polymerase chain reaction (RT-PCR)  
85 or lateral flow-based rapid antigen test (RAT) during the study period. Gender  
86 difference in infection was not observed. Patients in 2×BNT were relatively younger  
87 than 3×BNT (2×BNT vs 3×BNT: median 32 years vs median 40 years,  $p<0.0001$ ),  
88 likely indicating the hesitation for taking the third dose BNT162b2 among younger  
89 people. Patients received either two dose or three dose of BNT162b2 were  
90 significantly younger than subjects received CoronaVac (2×CorV vs 2×BNT: median  
91 45.5 years vs median 32 years,  $p<0.0001$ ; 3×CorV vs 3×BNT: median 49 years vs  
92 median 40 years,  $p=0.045$ ) (Table 1 and Table S1), in line with elder people's  
93 preference of taking CoronaVac with less side effects. Moreover, shorter median  
94 interval between latest vaccination and symptom onset was noticed for 3×BNT than  
95 3×CorV and for 2×BNT and 2×CorV (2×BNT vs 3×BNT: median 227 days vs median  
96 45 days,  $p<0.0001$ ; 2×CorV vs 3×CorV: median 224 days vs median 53.5 days,  
97  $p<0.0001$ ), respectively (Table 1 and Table S1).  
98 Infections were found in both 2×BNT and 2×CorV groups with comparable incidence  
99 rates of 49.2% (78/169) and 48.6% (18/37) ( $p=0.783$ ), respectively. The third dose  
100 vaccination groups, however, showed significantly lower incident rates of 16.6%  
101 (3×BNT,  $p<0.0001$ ), 20.6% (3×CorV,  $p=0.003$ ) compared with 2×BNT and 2×CorV  
102 groups, respectively. The third heterologous BNT162b2 vaccination group  
103 (2×CorV+1×BNT) exhibited the lowest incident rate of 6.3% compared with the  
104 2×CorV group ( $p<0.0001$ ). No statistical significance was found in incident rates  
105 between any 3 dose groups (Table 1 and Table S1). Notably, most infected subjects  
106 developed mild disease presenting three major symptoms including fever, cough  
107 and/or sore throat. Asymptomatic infections were only found in 2×BNT and 3×BNT

108 groups with low frequencies of 3.8% (3/78) and 3.4% (1/29), respectively (Table 1).  
109 The hospitalization rate was lower for 3×BNT (3.4%) than that of 3×CorV (21.4%)  
110 patients. One median day shorter illness was observed in 2×BNT (7 days) and 3×BNT  
111 (7 days) than those of 2×CorV (8 days) and 3×CorV (8 days) without statistical  
112 significance. There was no significant difference in terms of duration time for viral  
113 antigen conversion to negativity between any groups (Table 1 and Table S1). These  
114 results suggested that the third dose vaccination by both BNT162b2 and CoronaVac  
115 reduced the incident rate of BA.2 infection and the third dose of BNT162b2  
116 vaccination achieved a slightly lower hospitalization rate and sickness duration  
117 compared with the third CoronaVac.

118

119 To characterize the third dose vaccination-induced immune responses, we were able  
120 to obtain 92 blood samples donated by subjects in the same cohort including 42 from  
121 3×BNT, 29 from 3×CorV and 21 from 2×CorV+1×BNT at median 23, 55 and 47 days  
122 after the last vaccination, respectively, on January 27, 2022 (Table S2). Considering  
123 that memory B cell responses contribute to long-term immunological protection  
124 against COVID-19, we measured the frequency of spike (S)-specific B cells (gated on  
125 CD19<sup>+</sup> IgG<sup>+</sup> IgD<sup>-</sup> cells) after the third dose vaccination (Figure 1A). We found that the  
126 third dose of BNT162b2, either 3×BNT (mean 2.78%) or 2×CorV+1×BNT (mean  
127 1.33%), induced significant higher frequency of S-specific B cells than 3×CorV (mean  
128 0.35%) (Figure 1B). Significant boost effect of S-specific B cells was not observed by  
129 the third dose of CoronaVac (Figure 1C). Moreover, S-specific B cells elicited by the  
130 third dose of BNT162b2 reached the peak around 4-6 weeks and lasted for 3 months  
131 with a higher mean frequency than that of 3×CorV (Figure 1D). Further phenotypical  
132 analysis (Figure 1E) showed that the third dose of BNT162b2 resulted in elevated  
133 frequency of activated memory B cells (AM, CD21<sup>-</sup>CD27<sup>+</sup>) compared with 2×BNT or  
134 2×CorV whereas the third dose of CoronaVac enhanced the frequency of resting  
135 memory (RM) B cells (Figure 1F). The frequency of AM reached the peak at 4 weeks  
136 after the third booster and subsequently declined, accompanied by proportional  
137 increase of RM, in both 3×BNT and 2×CorV+1×BNT groups whereas AM remained  
138 unchanged in the 3×CorV group around two months (Figure 1G). These results  
139 demonstrated that S-specific memory B cells were predominantly activated by the  
140 third dose of BNT162b2 but insignificantly by the third dose of CoronaVac.

141

142 We then measured the titer and breadth of neutralizing antibodies (NAbs) against a  
143 full panel of current SARS-CoV-2 VOCs including D614G, Alpha, Beta, Delta and  
144 three Omicron variants (BA.1, BA.1.1 and BA.2) using the pseudovirus assay as we  
145 previously described (Peng et al., 2022a). We included data from subjects who

146 previously received 2×BNT or 2×CorV at the activation (0-4 weeks) and memory (4-  
147 12 weeks) periods were used for comparison (Peng et al., 2022a). In line with  
148 significantly higher frequencies of S-specific B cells, both 3×BNT- and  
149 2×CorV+1×BNT-vaccinees displayed significantly stronger geometric mean 50%  
150 neutralizing titers (GMT) than 3×CorV against all variants tested (Figure 1H). The  
151 overall fold of neutralization resistance followed the order of Alpha < Beta < Delta <  
152 BA.1 < BA.2 in all three vaccine groups. Omicron BA.2 was the most resistant  
153 variant with 4.67-, 4.74- and 6.49-fold reductions in 3×BNT, 3×CorV and  
154 2×CorV+1×BNT groups, respectively (Figure S1A). Moreover, based on the  
155 magnitude of geometric mean titer (GMT), 59% of 3×BNT and 48% of  
156 2×CorV+1×BNT vaccinees had high neutralization activity (>1280) against D614G  
157 whereas none of 3×CorV vaccinees showed similar activities (Figure S1B). For BA.2,  
158 neither 3×BNT nor 2×CorV+1×BNT vaccinees had high neutralization activity, but  
159 40% of 3×BNT and 29% of 2×CorV+1×BNT vaccinees still had medium  
160 neutralization activity (321-1280). Strikingly, 66% of 3×CorV vaccinees showed  
161 undetectable neutralization antibodies against BA.2. Furthermore, the third dose of  
162 BNT162b2 induced significant higher NAb titers against all VOCs in 3×BNT and  
163 2×CorV+1×BNT groups compared to the 2-dose groups at both 0-4 weeks (activation)  
164 and >4 weeks (memory) after vaccination (Table S3). In contrast to weak boost effects  
165 by the third dose of CoronaVac in the 3×CorV group, 10.1-12.9-fold and 10.9-15.5-  
166 fold enhancements against Omicron variants at activation and memory phases were  
167 observed after the third heterologous BNT162b2 (2×CorV+1×BNT), like the boost  
168 effects in the 3×BNT group (Table S3). Besides significantly increased NAb titers, the  
169 responder rates of anti-Omicron variants raised from 33% to 96%, from 0% to 78%  
170 and from 0% to 100% at 0-4 weeks, and from 0% to 100%, from 0% to 50% and from  
171 0% to 100% at >4 weeks in 3×BNT, 3×CorV and 2×CorV+1×BNT groups,  
172 respectively, post the last vaccination. Consistently, BA.2 exhibited the most resistant  
173 profile to the boost effect, especially in 3×CorV (Table S4). These results  
174 demonstrated that the third heterologous BNT162b2 vaccination in 2×CorV+1×BNT  
175 made significant improvement not only bringing the anti-Omicron responder rate to  
176 100% but also enhancing NAb titers close to 3×BNT at both 0-4 and >4 weeks (Table  
177 S3 and Table S4).

178

179 T cell responses may play an important role in control of SARS-CoV-2 infection  
180 (Peng et al., 2022b; Sette and Crotty, 2021; Zhou et al., 2020), CD4 and CD8 T cell  
181 responses to viral Spike and nucleocapsid protein (NP) were determined by measuring  
182 intracellular IFN- $\gamma$ , TNF- $\alpha$  and IL-2 (Figure 2A and 2E). Since many amino acid  
183 mutations were found in Omicron S, we measured ancestral and Omicron S-specific T

184 cell responses in parallel. Significantly higher mean frequencies of S-specific IFN- $\gamma$ <sup>+</sup>  
185 CD4 T cells were found in 3×BNT (ancestral: 0.069% and Omicron: 0.079%) than  
186 those in 3×CorV (ancestral: 0.024% and Omicron: 0.026%) and in 2×CorV+1×BNT  
187 (ancestral: 0.034% and Omicron: 0.030%) (Figure 2B). No significant differences of  
188 S-specific IFN- $\gamma$ <sup>+</sup> and polyfunctional CD4 T cells were found between ancestral and  
189 Omicron (Figure 2B and 2C). There were also no significant differences between  
190 2×BNT and 3×BNT, between 2×CorV and 3×CorV, and between 2×CorV and  
191 2×CorV+1×BNT at both activation (Figure 2D, left) and memory periods (Figure 2D,  
192 right). In addition, significantly higher mean frequencies of S-specific IFN- $\gamma$ <sup>+</sup> CD8 T  
193 cells were found in 3×BNT (ancestral: 0.082% and Omicron: 0.096%) than those in  
194 3×CorV (ancestral: 0.017% and Omicron: 0.015%) and in 2×CorV+1×BNT (ancestral:  
195 0.021% and Omicron: 0.013%) (Figure 2F). The frequency of S-specific  
196 polyfunctional CD8 T cells were relatively higher in 3×BNT than those in 3×CorV  
197 and 2×CorV+1×BNT (Figure 2G). Significant increase of S-specific IFN- $\gamma$ <sup>+</sup> CD8 T  
198 cells was not observed in 3×BNT than that in 2×BNT at acute (Figure 2H, left) but  
199 observed at the memory period (Figure 2H, right). CoronaVac, however, did not show  
200 similar activities. Besides spike, weak nucleocapsid protein (NP)-specific IFN- $\gamma$ <sup>+</sup> CD4  
201 and CD8 T cells were observed in 3 groups although more CD4 T cell responders  
202 (67%) were found in 3×CorV (Figure S2), indicating the pre-existing of cross-reactive  
203 NP-specific T cell responses in unexposed donors (Le Bert et al., 2020). Considering  
204 that S-specific circulating T follicular helper cells (cTFH, CD45RA<sup>-</sup>  
205 CXCR5<sup>+</sup>CD4<sup>+</sup>) are associated with potent NAb responses (Juno et al., 2020), we  
206 found that the frequency of IFN- $\gamma$ <sup>+</sup> cTFH cells were low with mean 0.032-0.047%,  
207 0.01-0.022% and 0.017-0.059% in 3×BNT, 3×CorV and 2×BNT+1×CorV groups,  
208 respectively (Figure S3A-S3B). However, the responder rate was higher in 3×BNT  
209 and 2×BNT+1×CorV than that of 3×CorV (7-10%) (Figure S3B). These results  
210 indicated that the third dose of BNT162b2 vaccination significantly improved S-  
211 specific IFN- $\gamma$ <sup>+</sup>, polyfunctional and memory T cells in 3×BNT but not in  
212 2×CorV+1×BNT and 3×CorV.

213

214 Immune correlation analysis was subsequently conducted for 23 antigen-specific  
215 measurements together with gender, age, time interval between second and third  
216 vaccinations, sampling time after third dose of vaccination and infection. Age and  
217 gender did not show significant correlation with any immune responses in either  
218 3×BNT or 2×CorV+1×BNT groups (Figure 3A-3C) but they were positively  
219 correlated with S-specific B and T cell responses in the 3×CorV group (Figure 3B).  
220 Consistent with the kinetics of AM proportion, S-specific AM correlated negatively  
221 with the time after third dose of vaccination in the 2×CorV+1×BNT group (Figure

222 3C). Positive correlations between S-specific B cells and NABs were observed in both  
223 3×BNT and 2×CorV+1×BNT groups while the RM was positively associated with  
224 NABs in the 3×CorV group (Figure 3A-3C, green rectangle). Consistently, significant  
225 positive correlations were found in NABs titers against all 7 viral variants (Figure 3A-  
226 3C, purple triangles). Since the third dose vaccination by BNT162b2 or CoronaVac  
227 did not improve S-specific CD4 T cell responses among 2×CorV vaccinees, positive  
228 correlations among S-specific CD4 T cells, S-specific B cells and NABs were limited  
229 to the 3×BNT group (Figure 3A, red rectangle). However, positive correlations  
230 between S-specific cTFH cells and NABs were observed in 3×BNT and  
231 2×CorV+1×BNT, but not in 3×CorV (Figure 3A-3C, yellow rectangles). Of note, in  
232 the 3×BNT group, Omicron S-specific CD4 T cell and cTFH responses exhibited  
233 stronger correlation with S-specific B cell and the broadly NABs than those with  
234 ancestral S-specific CD4 T cell and cTFH responses (Figure 3A, yellow rectangle).

235

236 We then combined all three groups for overall analysis (Figure 3D). Strong positive  
237 correlations were consistently found in NABs titers against all 7 viral variants (Figure  
238 3D, purple triangle). Both age and S-specific RM B cells were negatively correlated  
239 with NAb activity (Figure 3D, purple rectangle) whereas S-specific AM B cells were  
240 positively correlated with neutralizing activity (Figure 3D, green rectangle). Moreover,  
241 the frequency of S-specific AM B cells was significantly lower in infected vaccinees  
242 than uninfected vaccinees before vaccine-breakthrough infection (Figure 3E) whereas  
243 the anti-BA.2 NAb titer did not achieve statistical significance (Figure 3F). Notably,  
244 few vaccinees (2/13, 15.4%) with NAb titer higher than 1:320 became infected. We  
245 further analyzed the relationships between immune responses and clinical  
246 characteristics among our study subjects who were subsequently infected by BA.2  
247 (Figure 3G). NAb titer was negatively correlated with hospitalization rate (Figure 3G,  
248 purple rectangle), indicating the importance of NAb in reducing COVID-19 severity.  
249 Age was positively correlated with viral negative conversion time, suggesting a longer  
250 viral clearance time among older patients (Figure 3G, black square). Notably, IFN- $\gamma$ <sup>+</sup>  
251 CD4 T cells were negatively associated with age and viral negative conversion time  
252 (Figure 3G, red squares). In addition, hospitalization was negatively correlated with  
253 the interval between second and third dose of vaccinations and with the interval  
254 between third dose of vaccination and symptom onset, likely suggesting the  
255 importance of the optimal timing for the third dose vaccination (Figure 3G, black  
256 rectangle). These results demonstrated that third dose vaccination-induced NABs and  
257 T cell response contributed to reducing risk of severe clinical outcomes after infection.

258

259 **Discussion**

260 Clinical trials have demonstrated that a third heterologous booster vaccination by  
261 EUA SARS-CoV-2 mRNA vaccines (BNT162b2 and mRNA-1273) increased  
262 neutralizing antibody titer accompanied by better prevention and lower disease  
263 severity than the initial two doses with BBIP-CorV or CoronaVac during the Gamma  
264 and Delta epidemics (Accorsi et al., 2022; Cerqueira-Silva et al., 2022; Costa  
265 Clemens et al., 2022; Moghnieh et al., 2021; Zeng et al., 2021). After the emergence  
266 of the Omicron variants, some cohort studies reported that Omicron BA.1 infection  
267 was associated with milder disease and shorter duration of clinical symptoms than  
268 Delta infection (Davies et al., 2022; Houhamdi et al., 2022; Jassat et al., 2022; Kim et  
269 al., 2022; Maslo et al., 2022; Menni et al., 2022; Wolter et al., 2022). The third  
270 vaccination was helpful in reducing the infection and hospitalization rates during the  
271 Delta and Omicron BA.1 prevalence in other countries (Accorsi et al., 2022;  
272 Thompson et al., 2022; Yoon et al., 2022). Till now, the association between immune  
273 responses induced by the third vaccination and Omicron BA.2 breakthrough infection  
274 remains unknown. In this study, we investigated immune responses of vaccinees after  
275 they received the third vaccination right before the explosive fifth wave of SARS-  
276 CoV-2 epidemic caused by Omicron BA.2 in Hong Kong (Cheng et al., 2022b). We  
277 also followed up the infection status and clinical outcomes of our study subjects  
278 during the wave period. We found that the third dose of either BNT162b2 or  
279 CoronaVac led to significantly lower infection rates than those who received the  
280 standard 2-dose vaccination regimen, particularly in the heterologous  
281 2×CorV+1×BNT group. Furthermore, the third BNT162b2 resulted in significantly  
282 higher rates of asymptomatic and lower rates of hospitalization than 3×CorV group.  
283 Our findings, therefore, provided critical knowledge on understanding the role of third  
284 vaccination-induced immune responses in protection against the globally spreading  
285 Omicron BA.2 infections.

286

287 Omicron BA.2 has higher transmissibility and immune evasion than Omicron BA.1  
288 (Barnes et al., 2020; Sho Iketani et al., 2022), explaining its rapid spread in Hong  
289 Kong and other places (Lyngse et al., 2022; Yamasoba et al., 2022). Since the end of  
290 January 2022, BA.2 has quickly dominated the fifth wave of SARS-CoV-2 epidemic  
291 in Hong Kong, where the universal masking policy remains unchanged, with a shorter  
292 doubling time of 1.28 days than 1.6-2.8 days of BA.1 (Cheng et al., 2022b). BA.2  
293 shares 21 mutations in the S protein with BA.1. Although Q496S and N501Y  
294 mutations are missing in the BA.2 S-BRD domain, unique S371F, T376A, D405N and  
295 R408S mutations have been found (Sho Iketani et al., 2022). Due to these mutations,  
296 we and others (Sho Iketani et al., 2022; Yu et al., 2022) demonstrated that NAb titers  
297 against BA.2 showed 0.97-1.18 and 1.14-1.42 time lower than those against BA.1 at



298 0-4 weeks and >4 weeks after third vaccination by BNT162b2 or CoronaVac. Also,  
299 we consistently found that BA.2 confers the highest NAb resistance compared with  
300 other VOCs including BA.1 and BA.1.1. While 58-71% and 29-40% BNT162b2  
301 booster recipients had low ( $IC_{50}$ : 20-320) and median ( $IC_{50}$ : 321-1280) NABs against  
302 BA.2, 66% CoronaVac booster recipients had undetectable ( $IC_{50}<20$ ) NABs.  
303 Surprisingly, although the third BNT162b2 vaccination boosted higher anti-BA.2  
304 NAb titer and responder rate as well as more S-specific T cell responses than the third  
305 CoronaVac, there was no significant difference in incidence of breakthrough  
306 infections between 3×BNT and 3×CorV. To this end, we believe that, although low  
307 amounts of NABs and S-specific T cell responses were observed among 3×CorV  
308 vaccinees, the prior two doses of CoronaVac likely primed both B and T cell memory  
309 responses well. This hypothesis was then supported by the significantly elevated  
310 NABs and S-specific T cell responses among 2×CorV+1×BNT vaccinees after they  
311 received the third vaccination with BNT162b2. Moreover, comparable neutralizing  
312 activity were reported in patients with breakthrough infection after two doses of  
313 inactivated vaccines and individuals who received a third heterologous vaccination  
314 with AZD1222 (Suntronwong et al., 2022), suggesting that breakthrough infection  
315 recalled and boosted the antibody responses-induced by inactivated vaccines. It is,  
316 therefore, conceivable that BA.2 infection might also activate similar immune  
317 responses among 2×CorV vaccinees for protection. Such BA.2 infection-mediated  
318 immune activation might be even more profound among 3×CorV vaccinees, resulting  
319 in significantly reduced incidence and hospitalization rates compared with 2×CorV  
320 vaccinees. Therefore, when all vaccinees were analyzed together, we found that S-  
321 specific activated memory B cell subset was a significant factor in preventing BA.2  
322 infection because these AM B cells could differentiate into long-lived plasma cells  
323 (Lau et al., 2017) and are associated with expansion of memory B cells, and re-  
324 establishment of B cell memory after the third vaccination (Goel et al., 2022;  
325 Muecksch et al., 2022). Moreover, T cell responses could be another protective factor  
326 because they may recognize mutated viral variants without significantly reduced  
327 potency (Scully et al., 2017). We found that both BNT162b2 and CoronaVac-induced  
328 T cell responses cross-reacted to Omicron S peptides with comparable activities to  
329 ancestral S (Gao et al., 2022; Keeton et al., 2022). Since S-specific T cells are  
330 associate with control and clearance of the ongoing infection (Sette and Crotty,  
331 2021), potent T cell responses correlated with fewer hospitalization among patients  
332 who received the third vaccination.

333

### 334 **Limitations of the study**

335 There are some limitations in our study. First, we were unable to obtain blood samples

336 from our subjects after they became infected and quarantined. We, therefore, could  
337 not determine the B and T cell activation post BA.2 infection. Nevertheless, vaccine  
338 breakthrough infections often recall rapid NAbs and T responses against various  
339 VOCs, including Omicron (Collier et al., 2022; Suntronwong et al., 2022; Zhou et al.,  
340 2022). Second, most of our infected vaccinees were confirmed infection by self-RAT,  
341 thus the effect of different vaccine regimens on controlling viral loads was not  
342 determined. It remains necessary to compare the dynamics and magnitudes of recalled  
343 immune responses among vaccinees with BA.2 breakthrough infection patients in the  
344 future.

345

346 In summary, we report that 3×BNT and 3×CorV provided better protection against  
347 SARS-COV-2 BA.2 than 2×BNT and 2×CorV. High frequencies of S-specific  
348 activated memory B cells and cross-reactive T cell responses induced by the third  
349 vaccination are critical for protection and illness reduction during the Omicron BA.2  
350 breakthrough infection.

351

## 352 **STAR Methods**

353

## 354 **RESOURCE AVAILABILITY**

### 355 **Lead Contact**

356 Further information and requests for resources and reagent should be directed to and

357 will be fulfilled by the Lead Contact, Zhiwei Chen (zchenai@hku.hk).

358

### 359 **Materials Availability**

360 This study did not generate new unique reagents.

361

### 362 **Data and Code Availability**

363 The study did not generate any unique dataset or code.

364

## 365 **EXPERIMENTAL MODELS AND SUBJECT DETAILS**

## 366 **MATERIALS AND METHODS**

367

368 **Human subjects**

369 This study was approved by the Institutional Review Board of the University of Hong  
370 Kong/Hospital Authority Hong Kong West Cluster (Ref No. UW 21-452). A total of  
371 481 participants were recruited in this study. Written informed consent and  
372 questionnaire of vaccination and infection were obtained from these subjects. Patients  
373 provided the information of symptom onset date, type of symptoms, hospitalization,  
374 duration of illness and the date of viral negative conversion as summarized in Table 1.  
375 Peripheral blood mononuclear cells (PBMCs) from 92 participants who had third  
376 vaccination were isolated from fresh blood samples before SARS-CoV-2 infection  
377 using Ficoll-Paque density gradient centrifugation in our BSL-3 laboratory at the  
378 same day of blood collection. The majority of purified PBMCs were used for immune  
379 cell phenotyping whereas plasma samples were subjected to antibody testing. The rest  
380 of the cells were cryopreserved in freezing medium (Synth-a-Freeze Cryopreservation  
381 Medium, ThermoFisher Scientific) at  $5 \times 10^6$  cells/mL at  $-150^\circ\text{C}$ .

382

383 **Pseudotyped viral neutralization assay**

384 To determine the neutralizing activity of subject' plasma, plasma was inactivated at  
385  $56^\circ\text{C}$  for 30 min prior to a pseudotyped viral entry assay. In brief, different SARS-  
386 CoV-2 pseudotyped viruses were generated through co-transfection of 293T cells with  
387 2 plasmids, pSARS-CoV-2 S and pNL4-3Luc\_Env\_Vpr, carrying the optimized  
388 SARS-CoV-2 S gene and a human immunodeficiency virus type 1 backbone,  
389 respectively. At 48 h post-transfection, viral supernatant was collected and frozen at  
390  $-150^\circ\text{C}$ . Serially diluted plasma samples (from 1:20 to 1:14580) were incubated with  
391 200 TCID<sub>50</sub> of pseudovirus at  $37^\circ\text{C}$  for 1 h. The plasma-virus mixtures were then  
392 added into pre-seeded HEK293T-hACE2 cells. After 48 h, infected cells were lysed,  
393 and luciferase activity was measured using Luciferase Assay System kits (Promega)  
394 in a Victor3-1420 Multilabel Counter (PerkinElmer). The 50% inhibitory  
395 concentrations (IC<sub>50</sub>) of each plasma specimen were calculated to reflect anti-SARS-  
396 CoV-2 potency.

397

398 **Antigen-specific B cells**

399 To characterize the SARS-CoV-2 Spike-specific B cells, PBMCs from each vaccinee  
400 were first stained with an antibody cocktail contained dead cell dye (Zombie aquae),  
401 CD3-Pacific Blue, CD14-Pacific Blue, CD56-Pacific Blue, CD19-BV785, IgD-  
402 BV605, IgG-PE, CD27-BV711, CD21-PE/Cy7, CD38-Percp/Cy5.5, CD11C-  
403 APC/Fire750 and His-tag Spike protein. Cells were then washed with FACS buffer  
404 (PBS with 2% FBS) and further stained with the secondary antibodies including APC  
405 anti-His and DyLight 488 anti-his antibodies. Stained cells were acquired by

406 FACS Aria III Flow Cytometer (BD Biosciences) and analyzed with FlowJo software  
407 (v10.6) (BD Bioscience).

408

#### 409 **Intracellular cytokine staining (ICS)**

410 To measure antigen-specific T cell responses, PBMCs were stimulated with 2 µg/mL  
411 Spike peptide pool (15-mer overlapping by 11) from SARS-CoV-2 ancestral or  
412 Omicron variant, or 2 µg/mL nucleocapsid protein (NP) peptide pool in the presence  
413 of 0.5 µg/mL anti-CD28 and anti-CD49d mAbs (Biolegend). Cells were incubated at  
414 37°C for 9 hours and BFA was added at 3 h post incubation, as previously described  
415 (Zhou et al., 2020). PMA/ionomycin stimulation was included as positive control.  
416 Cells were then washed with staining buffer (PBS containing 2% FBS) and stained  
417 with mAbs against surface markers, including dead cell dye (Zombie aqua), CD3-  
418 Pacific Blue, CD4-Percp/Cy5.5, CD8-APC/Fire750, CD45RA-BV711, CCR7-  
419 BV785, CXCR5-APC, CCR6-BV605. For intracellular staining, cells were fixed and  
420 permeabilized with BD Cytofix/Cytoperm (BD Biosciences) prior to staining with the  
421 mAbs against IFN-γ-PE, TNF-α-AF488 and IL-2-PE-Cy7. Stained cells were  
422 acquired by FACS Aria III Flow Cytometer (BD Biosciences) and analyzed with  
423 FlowJo software (v10.6) (BD Bioscience). Results were subtracted from percentage of  
424 unstimulated control.

425

#### 426 **Correlation plots and heatmap visualizations**

427 Correlograms plotting the Spearman rank correlation coefficient ( $r$ ), between all  
428 parameter pairs were generated with the corrplot package (v0.84) (Wei and Sikmo,  
429 2017) running under R (v3.6.1) in Rstudio (1.1.456). Spearman rank two-tailed P  
430 values were calculated using corr.test (psych v1.8.12) and graphed (ggplot2 v3.1.1)  
431 based on \* $p < 0.05$ , \*\* $p < 0.01$ , \*\*\* $p < 0.001$ .

432

#### 433 **Statistical analysis**

434 Statistical analysis was performed using PRISM 8.0. For between-group or multiple-  
435 group categorical values comparison, two-sided chi-square tests or fisher's exact tests  
436 were used. Unpaired Student's t tests were used to compare group means between two  
437 groups only. A P-value  $< 0.05$  was considered significant.

438

#### 439 **Supplemental information**

440 The supplemental information includes 4 Tables and 3 Figures.

441

442 **Acknowledgement**

443 We sincerely thank Drs. David D. Ho and Pengfei Wang for the expression plasmids  
444 encoding for D614G, Alpha and Beta variants, Dr. Linqi Zhang for the Delta variant  
445 plasmid, Mrs. Tsz-Tat Chan and Mark Wai-Kwan Woo for helping with the survey.

446

447 **Fundings:** This study was supported by the Hong Kong Research Grants Council  
448 Collaborative Research Fund (C7156-20G, C1134-20G and C5110-20G) and Health  
449 and Medical Research Fund (19181012, COVID1903010 and COVID190123);  
450 Wellcome Trust (P86433); Shenzhen Science and Technology Program  
451 (JSGG20200225151410198 and JCYJ20210324131610027); the Hong  
452 Kong Health@InnoHK, Innovation and Technology Commission; and the China  
453 National Program on Key Research Project (2020YFC0860600, 2020YFA0707500  
454 and 2020YFA0707504); and donations from the Friends of Hope Education Fund.  
455 Z.C.'s team was also partly supported by the Hong Kong Theme-Based Research  
456 Scheme (T11-706/18-N).

457

458 **Author contributions:** Z.C. and R.Z. conceived and designed the study. R.Z. and Z.C.  
459 designed experiments, analyzed data, and wrote the manuscript. Z.C., R.Z. X.L., Y-  
460 C.K., H.-Y.K., I.F.-N.H., and K.-Y.Y coordinated donor recruitment and specimen  
461 collection. R.Z., N.L., H.H., D.Y., Q.P. prepared the clinical sample. R.Z., N.L. and  
462 H.H. performed the flow cytometry analysis. R.Z., N.L. and D.Y. performed  
463 pseudoviral neutralization assay. Z.D. did the correlation analysis.

464

465 **Competing interests:** The authors declare no conflict of interest.

466

467 **Data and material availability:** All data are available in the manuscript or  
468 supplementary materials. Further information and requests for resources and reagent  
469 should be directed to and will be fulfilled by the Lead Contact, Zhiwei Chen  
470 (zchenai@hku.hk).

471

472 **Figure legends**

473 **Figure 1. Activation of spike-specific memory B cells by the third vaccination. (A)**

474 Representative flow cytometry plots showing staining patterns of SARS-CoV-2 Spike  
475 probes on memory B cells (IgD<sup>-</sup> IgG<sup>+</sup> CD19<sup>+</sup>). **(B)** Quantified results depict the  
476 percentage of Spike<sup>+</sup> B cells in overall 3-dose vaccination recipients. **(C)**  
477 Comparisons of Spike<sup>+</sup> B cell frequency between 2-dose and 3-dose samples collected  
478 within 4 weeks after vaccinations. **(D)** Cross-sectional analysis of Spike-specific B  
479 cells by time after third dose vaccination. The connection lines indicate the mean

480 value. (E) Phenotypes of Spike-specific B cells were defined by using CD21 and  
481 CD27 markers. (F) Pie chart showed the proportion of activated (AM), tissue-like  
482 (TLM) memory, intermediate memory (IM) and resting-memory (RM) B cells. (G)  
483 Cross-sectional analysis of the percentage of AM (upper) and RM (bottom) in Spike-  
484 specific B cells by time after third vaccination. The connection lines indicate the mean  
485 value. (H) Neutralizing antibody titers ( $IC_{50}$  represents serum dilution required to  
486 achieve 50% virus neutralization) against seven SARS-CoV-2 strains were measured  
487 by pseudovirus-based assay among 3×BNT (orange), 3×CorV (blue) and  
488 2×CorV+1×BNT vaccinees (purple) after the third dose vaccination. Numbers under  
489 the x-axis indicate the responder rates ( $IC_{50}>20$  termed ‘responder’). Each symbol  
490 represents an individual donor with a line indicating the mean of each group. Statistics  
491 were generated by using 2-tailed Student’s t test. \* $p<0.05$ ; \*\* $p<0.01$ ; \*\*\* $p<0.001$ .  
492 See also Figure S1 and Table S2-S4.

493

494 **Figure 2. Spike-specific CD4 and CD8 T cell responses.** PBMCs were stimulated  
495 with the Spike peptide pools from ancestral or Omicron SARS-CoV-2 prior to  
496 intracellular cytokine staining assay. Representative flow cytometry plots showing  
497 single positive of IFN- $\gamma^+$  or TNF- $\alpha^+$  or IL-2 $^+$  as well as the polyfunctional cells with  
498  $\geq 2$  cytokines among CD4 $^+$  (A) and CD8 $^+$  (E) T cells. Paired analysis of the  
499 frequencies of IFN- $\gamma$ -producing CD4 $^+$  (B) and CD8 $^+$  (F) T cells as well as the  
500 frequencies of polyfunctional CD4 $^+$  (C) and CD8 $^+$  (G) T cells to ancestral (open dots)  
501 or Omicron (solid dots) Spike among the 3×BNT (orange), 3×CorV (blue) and  
502 2×CorV+1×BNT (purple) vaccinees. The mean frequencies were depicted under the  
503 x-axis. The frequencies of IFN- $\gamma$ -producing CD4 $^+$  (D) and CD8 $^+$  (H) T cell to ancestral  
504 Spike among 2×BNT, 3×BNT, 2×CorV, 3×CorV and 2×CorV+1×BNT vaccinees at 0-  
505 4 weeks (left) and >4 weeks (right) periods after vaccinations. Undetected (UD): % of  
506 IFN- $\gamma^+$  cells<0.00781%. The green lines in B, C, F, G indicate the change of mean  
507 responses to ancestral and Omicron Spike. The responses are depicted as the  
508 background-subtracted percentage of S-specific T cells (Background subtraction  
509 refers to the subtraction of the values of the negative control sample from the peptide-  
510 stimulated sample). The responder rates were depicted on the top of dots (% of IFN- $\gamma^+$   
511 cells>0.00781% termed ‘responder’ after subtracted from percentage of unstimulated  
512 control). Each symbol represents an individual donor with a line indicating the mean  
513 of each group. Statistics were generated by using 2-tailed Student’s t test. Ns: no  
514 significance, \* $p<0.05$ ; \*\* $p<0.01$ ; \*\*\* $p<0.001$ .  
515 See also Figure S2 and S3.

516

517 **Figure 3. Associations among humoral, cellular immune response and**

518 **breakthrough infection features.** Correlogram of immune responses among 3×BNT  
519 (A), 3×CorV (B), 2×CorV+1×BNT (C) and overall (D) vaccinees. Comparison of  
520 AM<sup>+</sup> B cell frequency on Spike-specific B cells (E) and neutralizing titer against  
521 BA.2 (F) between uninfected and infected vaccinees. Uninfected vaccinees, infected  
522 3×BNT vaccinees, infected 3×CorV vaccinees and infected 2×CorV+1×BNT  
523 vaccinees were presented as grey, orange, blue and purple dots, respectively. Statistics  
524 were generated by using 2-tailed Student's t test. \*p<0.05. (G) Correlogram of clinical  
525 characteristics and immune responses among patients. Spearman rank order  
526 correlation values (r) are shown from red (-1.0) to blue (1.0); r values are indicated by  
527 color and square size. p values are indicated by white asterisks. The green rectangles  
528 denote SARS-CoV-2 Spike-specific B cell features, the purple triangle and rectangles  
529 denote anti-SARS-CoV-2 variants' neutralizing antibody features, the red rectangles  
530 denote the SARS-CoV-2 Spike-specific CD4 T cell features, the yellow rectangle  
531 denotes the SARS-CoV-2 Spike-specific cTFH features and the black rectangles  
532 denotes clinical characteristic features.

533

## 534 **References**

535 Abu-Raddad, L.J., Chemaitelly, H., Butt, A.A., and National Study Group for, C.-V.  
536 (2021). Effectiveness of the BNT162b2 Covid-19 Vaccine against the B.1.1.7 and  
537 B.1.351 Variants. *N Engl J Med* 385, 187-189.

538 Accorsi, E.K., Britton, A., Fleming-Dutra, K.E., Smith, Z.R., Shang, N., Derado, G.,  
539 Miller, J., Schrag, S.J., and Verani, J.R. (2022). Association Between 3 Doses of  
540 mRNA COVID-19 Vaccine and Symptomatic Infection Caused by the SARS-CoV-2  
541 Omicron and Delta Variants. *JAMA* 327, 639-651.

542 Baden, L.R., El Sahly, H.M., Essink, B., Kotloff, K., Frey, S., Novak, R., Diemert, D.,  
543 Spector, S.A., Rouphael, N., Creech, C.B., *et al.* (2021). Efficacy and Safety of the  
544 mRNA-1273 SARS-CoV-2 Vaccine. *N Engl J Med* 384, 403-416.

545 Barnes, C.O., Jette, C.A., Abernathy, M.E., Dam, K.A., Esswein, S.R., Gristick, H.B.,  
546 Malyutin, A.G., Sharaf, N.G., Huey-Tubman, K.E., Lee, Y.E., *et al.* (2020). SARS-  
547 CoV-2 neutralizing antibody structures inform therapeutic strategies. *Nature* 588, 682-  
548 687.

549 Cerqueira-Silva, T., Katikireddi, S.V., de Araujo Oliveira, V., Flores-Ortiz, R., Junior,  
550 J.B., Paixao, E.S., Robertson, C., Penna, G.O., Werneck, G.L., Barreto, M.L., *et al.*  
551 (2022). Vaccine effectiveness of heterologous CoronaVac plus BNT162b2 in Brazil.  
552 *Nat Med* 28, 838-843.

553 Cheng, S.M.S., Mok, C.K.P., Leung, Y.W.Y., Ng, S.S., Chan, K.C.K., Ko, F.W., Chen,  
554 C., Yiu, K., Lam, B.H.S., Lau, E.H.Y., *et al.* (2022a). Neutralizing antibodies against  
555 the SARS-CoV-2 Omicron variant BA.1 following homologous and heterologous

556 CoronaVac or BNT162b2 vaccination. *Nat Med* 28, 486-489.

557 Cheng, V.C., Ip, J.D., Chu, A.W., Tam, A.R., Chan, W.M., Abdullah, S.M.U., Chan,  
558 B.P., Wong, S.C., Kwan, M.Y., Chua, G.T., *et al.* (2022b). Rapid spread of SARS-  
559 CoV-2 Omicron subvariant BA.2 in a single-source community outbreak. *Clin Infect*  
560 *Dis ciac203*.

561 Collier, A.Y., Brown, C.M., McMahan, K.A., Yu, J., Liu, J., Jacob-Dolan, C.,  
562 Chandrashekar, A., Tierney, D., Ansel, J.L., Rowe, M., *et al.* (2022). Characterization  
563 of immune responses in fully vaccinated individuals following breakthrough infection  
564 with the SARS-CoV-2 delta variant. *Sci Transl Med*, eabn6150.

565 Costa Clemens, S.A., Weckx, L., Clemens, R., Almeida Mendes, A.V., Ramos Souza,  
566 A., Silveira, M.B.V., da Guarda, S.N.F., de Nobrega, M.M., de Moraes Pinto, M.I.,  
567 Gonzalez, I.G.S., *et al.* (2022). Heterologous versus homologous COVID-19 booster  
568 vaccination in previous recipients of two doses of CoronaVac COVID-19 vaccine in  
569 Brazil (RHH-001): a phase 4, non-inferiority, single blind, randomised study. *Lancet*  
570 399, 521-529.

571 Davies, M.A., Kassanje, R., Rosseau, P., Morden, E., Johnson, L., Solomon, W.,  
572 Hsiao, N.Y., Hussey, H., Meintjes, G., Paleker, M., *et al.* (2022). Outcomes of  
573 laboratory-confirmed SARS-CoV-2 infection in the Omicron-driven fourth wave  
574 compared with previous waves in the Western Cape Province, South Africa. *Trop Med*  
575 *Int Health*.

576 Gao, Y., Cai, C., Grifoni, A., Muller, T.R., Niessl, J., Olofsson, A., Humbert, M.,  
577 Hansson, L., Osterborg, A., Bergman, P., *et al.* (2022). Ancestral SARS-CoV-2-  
578 specific T cells cross-recognize the Omicron variant. *Nat Med* 28, 472-476.

579 Goel, R.R., Painter, M.M., Lundgreen, K.A., Apostolidis, S.A., Baxter, A.E., Giles,  
580 J.R., Mathew, D., Pattekar, A., Reynaldi, A., Khoury, D.S., *et al.* (2022). Efficient  
581 recall of Omicron-reactive B cell memory after a third dose of SARS-CoV-2 mRNA  
582 vaccine. *Cell*.

583 Houhamdi, L., Gautret, P., Hoang, V.T., Fournier, P.E., Colson, P., and Raoult, D.  
584 (2022). Characteristics of the first 1119 SARS-CoV-2 Omicron variant cases, in  
585 Marseille, France, November-December 2021. *J Med Virol* 94, 2290-2295.

586 Jassat, W., Abdool Karim, S.S., Mudara, C., Welch, R., Ozougwu, L., Groome, M.J.,  
587 Govender, N., von Gottberg, A., Wolter, N., Wolmarans, M., *et al.* (2022). Clinical  
588 severity of COVID-19 patients admitted to hospitals during the Omicron wave in  
589 South Africa. *medRxiv*, 2022.2002.2022.21268475.

590 Juno, J.A., Tan, H.X., Lee, W.S., Reynaldi, A., Kelly, H.G., Wragg, K., Esterbauer, R.,  
591 Kent, H.E., Batten, C.J., Mordant, F.L., *et al.* (2020). Humoral and circulating  
592 follicular helper T cell responses in recovered patients with COVID-19. *Nat Med* 26,  
593 1428-1434.



594 Keeton, R., Tincho, M.B., Ngomti, A., Baguma, R., Benede, N., Suzuki, A., Khan, K.,  
595 Cele, S., Bernstein, M., Karim, F., *et al.* (2022). T cell responses to SARS-CoV-2  
596 spike cross-recognize Omicron. *Nature* 603, 488-492.

597 Kim, M.K., Lee, B., Choi, Y.Y., Um, J., Lee, K.S., Sung, H.K., Kim, Y., Park, J.S.,  
598 Lee, M., Jang, H.C., *et al.* (2022). Clinical Characteristics of 40 Patients Infected With  
599 the SARS-CoV-2 Omicron Variant in Korea. *J Korean Med Sci* 37, e31.

600 Lau, D., Lan, L.Y., Andrews, S.F., Henry, C., Rojas, K.T., Neu, K.E., Huang, M.,  
601 Huang, Y., DeKosky, B., Palm, A.E., *et al.* (2017). Low CD21 expression defines a  
602 population of recent germinal center graduates primed for plasma cell differentiation.  
603 *Sci Immunol* 2, eaai8153.

604 Le Bert, N., Tan, A.T., Kunasegaran, K., Tham, C.Y.L., Hafezi, M., Chia, A., Chng,  
605 M.H.Y., Lin, M., Tan, N., Linster, M., *et al.* (2020). SARS-CoV-2-specific T cell  
606 immunity in cases of COVID-19 and SARS, and uninfected controls. *Nature* 584,  
607 457-462.

608 Lyngse, F.P., Kirkeby, C.T., Denwood, M., Christiansen, L.E., Mølbak, K., Møller,  
609 C.H., Skov, R.L., Krause, T.G., Rasmussen, M., Sieber, R.N., *et al.* (2022).  
610 Transmission of SARS-CoV-2 Omicron VOC subvariants BA.1 and BA.2: Evidence  
611 from Danish Households. *medRxiv*, 2022.2001.2028.22270044.

612 Maslo, C., Friedland, R., Toubkin, M., Laubscher, A., Akaloo, T., and Kama, B.  
613 (2022). Characteristics and Outcomes of Hospitalized Patients in South Africa During  
614 the COVID-19 Omicron Wave Compared With Previous Waves. *JAMA* 327, 583-584.

615 Menni, C., Valdes, A.M., Polidori, L., Antonelli, M., Penamakuri, S., Nogal, A.,  
616 Louca, P., May, A., Figueiredo, J.C., Hu, C., *et al.* (2022). Symptom prevalence,  
617 duration, and risk of hospital admission in individuals infected with SARS-CoV-2  
618 during periods of omicron and delta variant dominance: a prospective observational  
619 study from the ZOE COVID Study. *Lancet* 399, 1618-1624.

620 Moghnieh, R., Mekdashi, R., El-Hassan, S., Abdallah, D., Jisr, T., Bader, M., Jizi, I.,  
621 Sayegh, M.H., and Rahman Bizri, A. (2021). Immunogenicity and reactogenicity of  
622 BNT162b2 booster in BBIBP-CorV-vaccinated individuals compared with  
623 homologous BNT162b2 vaccination: Results of a pilot prospective cohort study from  
624 Lebanon. *Vaccine* 39, 6713-6719.

625 Muecksch, F., Wang, Z., Cho, A., Gaebler, C., Ben Tanfous, T., DaSilva, J., Bednarski,  
626 E., Ramos, V., Zong, S., Johnson, B., *et al.* (2022). Increased Memory B Cell Potency  
627 and Breadth After a SARS-CoV-2 mRNA Boost. *Nature*  
628 <https://doi.org/10.1038/s41586-022-04778-y>.

629 Peng, Q., Zhou, R., Wang, Y., Zhao, M., Liu, N., Li, S., Huang, H., Yang, D., Au, K.K.,  
630 Wang, H., *et al.* (2022a). Waning immune responses against SARS-CoV-2 variants of  
631 concern among vaccinees in Hong Kong. *EBioMedicine* 77, 103904.

632 Peng, Y., Felce, S.L., Dong, D., Penkava, F., Mentzer, A.J., Yao, X., Liu, G., Yin, Z.,  
633 Chen, J.L., Lu, Y., *et al.* (2022b). An immunodominant NP105-113-B\*07:02 cytotoxic  
634 T cell response controls viral replication and is associated with less severe COVID-19  
635 disease. *Nat Immunol* 23, 50-61.

636 Perez-Then, E., Lucas, C., Monteiro, V.S., Miric, M., Brache, V., Cochon, L., Vogels,  
637 C.B.F., Malik, A.A., De la Cruz, E., Jorge, A., *et al.* (2022). Neutralizing antibodies  
638 against the SARS-CoV-2 Delta and Omicron variants following heterologous  
639 CoronaVac plus BNT162b2 booster vaccination. *Nat Med* 28, 481–485.

640 Polack, F.P., Thomas, S.J., Kitchin, N., Absalon, J., Gurtman, A., Lockhart, S., Perez,  
641 J.L., Perez Marc, G., Moreira, E.D., Zerbini, C., *et al.* (2020). Safety and Efficacy of  
642 the BNT162b2 mRNA Covid-19 Vaccine. *N Engl J Med* 383, 2603-2615.

643 Scully, C., Georgakopoulou, E.A., and Hassona, Y. (2017). The Immune System:  
644 Basis of so much Health and Disease: 3. Adaptive Immunity. *Dent Update* 44, 322-  
645 324, 327.

646 Sette, A., and Crotty, S. (2021). Adaptive immunity to SARS-CoV-2 and COVID-19.  
647 *Cell* 184, 861-880.

648 Sho Iketani, Lihong Liu, Yicheng Guo, Liyuan Liu, Jasper F.-W. Chan, Yiming Huang,  
649 Maple Wang, Yang Luo, Jian Yu, Hin Chu, *et al.* (2022). Antibody evasion properties  
650 of SARS-CoV-2 Omicron sublineages. *Nature* 604, 553-556.

651 Suntronwong, N., Yorsaeng, R., Puenpa, J., Auphimai, C., Thongmee, T.,  
652 Vichaiwattana, P., Kanokudom, S., Duangchinda, T., Chantima, W., Pakchotanon, P.,  
653 *et al.* (2022). COVID-19 Breakthrough Infection after Inactivated Vaccine Induced  
654 Robust Antibody Responses and Cross-Neutralization of SARS-CoV-2 Variants, but  
655 Less Immunity against Omicron. *Vaccines (Basel)* 10, 391.

656 Tanriover, M.D., Doganay, H.L., Akova, M., Guner, H.R., Azap, A., Akhan, S., Kose,  
657 S., Erdinc, F.S., Akalin, E.H., Tabak, O.F., *et al.* (2021). Efficacy and safety of an  
658 inactivated whole-virion SARS-CoV-2 vaccine (CoronaVac): interim results of a  
659 double-blind, randomised, placebo-controlled, phase 3 trial in Turkey. *Lancet* 398,  
660 213-222.

661 Thompson, M.G., Natarajan, K., Irving, S.A., Rowley, E.A., Griggs, E.P., Gaglani, M.,  
662 Klein, N.P., Grannis, S.J., DeSilva, M.B., Stenehjem, E., *et al.* (2022). Effectiveness  
663 of a Third Dose of mRNA Vaccines Against COVID-19-Associated Emergency  
664 Department and Urgent Care Encounters and Hospitalizations Among Adults During  
665 Periods of Delta and Omicron Variant Predominance - VISION Network, 10 States,  
666 August 2021-January 2022. *MMWR Morbidity and mortality weekly report* 71, 139-  
667 145.

668 Voysey, M., Clemens, S.A.C., Madhi, S.A., Weckx, L.Y., Folegatti, P.M., Aley, P.K.,  
669 Angus, B., Baillie, V.L., Barnabas, S.L., Bhorat, Q.E., *et al.* (2021). Safety and

670 efficacy of the ChAdOx1 nCoV-19 vaccine (AZD1222) against SARS-CoV-2: an  
671 interim analysis of four randomised controlled trials in Brazil, South Africa, and the  
672 UK. *Lancet* 397, 99-111.

673 Wei, T., and Sikmo, V. (2017). package “corrplot”: Visualization of a Correlation  
674 Matrix (Version 0.84). <https://github.com/taiyun/corrplot>.

675 Wolter, N., Jassat, W., Walaza, S., Welch, R., Moultrie, H., Groome, M., Amoako,  
676 D.G., Everatt, J., Bhiman, J.N., Scheepers, C., *et al.* (2022). Early assessment of the  
677 clinical severity of the SARS-CoV-2 omicron variant in South Africa: a data linkage  
678 study. *Lancet* 399, 437-446.

679 Xia, S., Zhang, Y., Wang, Y., Wang, H., Yang, Y., Gao, G.F., Tan, W., Wu, G., Xu, M.,  
680 Lou, Z., *et al.* (2021). Safety and immunogenicity of an inactivated SARS-CoV-2  
681 vaccine, BBIBP-CorV: a randomised, double-blind, placebo-controlled, phase 1/2 trial.  
682 *Lancet Infect Dis* 21, 39-51.

683 Yamasoba, D., Kimura, I., Nasser, H., Morioka, Y., Nao, N., Ito, J., Uriu, K., Tsuda,  
684 M., Zahradnik, J., Shirakawa, K., *et al.* (2022). Virological characteristics of SARS-  
685 CoV-2 BA.2 variant. *bioRxiv*, 2022.2002.2014.480335.

686 Yoon, S.K., Hegmann, K.T., Thiese, M.S., Burgess, J.L., Ellingson, K., Lutrick, K.,  
687 Olsho, L.E.W., Edwards, L.J., Sokol, B., Caban-Martinez, A.J., *et al.* (2022).  
688 Protection with a Third Dose of mRNA Vaccine against SARS-CoV-2 Variants in  
689 Frontline Workers. *N Engl J Med* DOI: 10.1056/NEJMc2201821.

690 Yu, J., Collier, A.Y., Rowe, M., Mardas, F., Ventura, J.D., Wan, H., Miller, J., Powers,  
691 O., Chung, B., Siamatu, M., *et al.* (2022). Neutralization of the SARS-CoV-2  
692 Omicron BA.1 and BA.2 Variants. *N Engl J Med* 386, 1579-1580.

693 Zeng, G., Wu, Q., Pan, H., Li, M., Yang, J., Wang, L., Wu, Z., Jiang, D., Deng, X.,  
694 Chu, K., *et al.* (2021). Immunogenicity and safety of a third dose of CoronaVac, and  
695 immune persistence of a two-dose schedule, in healthy adults: interim results from  
696 two single-centre, double-blind, randomised, placebo-controlled phase 2 clinical trials.  
697 *Lancet Infect Dis* 22, 483-495.

698 Zhou, R., To, K.K., Peng, Q., Chan, J.M., Huang, H., Yang, D., Lam, B.H., Chuang,  
699 V.W., Cai, J.P., Liu, N., *et al.* (2022). Vaccine-breakthrough infection by the SARS-  
700 CoV-2 omicron variant elicits broadly cross-reactive immune responses. *Clin Transl*  
701 *Med* 12, e720.

702 Zhou, R., To, K.K., Wong, Y.C., Liu, L., Zhou, B., Li, X., Huang, H., Mo, Y., Luk,  
703 T.Y., Lau, T.T., *et al.* (2020). Acute SARS-CoV-2 Infection Impairs Dendritic Cell and  
704 T Cell Responses. *Immunity* 53, 864-877 e865.

**Table 1. Demographic characteristics of breakthrough infection among 481 vaccinees**

| Vaccinations                                                                                       | 2xBNT<br>(n=169)  | 3xBNT<br>(n=175)  | 2xCorV<br>(n=37) | 3xCorV<br>(n=68) | 2xCorV+1xBNT<br>(n=32) |
|----------------------------------------------------------------------------------------------------|-------------------|-------------------|------------------|------------------|------------------------|
| Infection rate %<br>(No. patient/Total No.)                                                        | 49.2%<br>(78/169) | 16.6%<br>(29/175) | 48.6%<br>(18/37) | 20.6%<br>(14/68) | 6.3%<br>(2/32)         |
| <b>Patients</b>                                                                                    |                   |                   |                  |                  |                        |
| Age, year<br>(ranges in parentheses)                                                               | 32<br>(24-58)     | 40<br>(27-60)     | 45.5<br>(24-64)  | 49<br>(20-62)    | 47.5<br>(37-58)        |
| Gender                                                                                             |                   |                   |                  |                  |                        |
| Male (% of all participants)                                                                       | 60 (48.8%)        | 20 (16.7%)        | 11 (47.8%)       | 9 (20%)          | 2 (7.1%)               |
| Female (% of all participants)                                                                     | 18 (39.1%)        | 9 (16.4%)         | 7 (50%)          | 5 (21.7%)        | 0 (0%)                 |
| Median interval days<br>between latest vaccination<br>and symptom onset (ranges<br>in parentheses) | 227<br>(140-332)  | 45<br>(0-111)     | 224<br>(4-341)   | 53.5<br>(1-109)  | 25.5<br>(10-41)        |
| Asymptomatic rate %<br>(No. Asymptomatic<br>patient/No. total patient)                             | 3.8%<br>(3/78)    | 3.4%<br>(1/29)    | 0 %<br>(0/18)    | 0%<br>(0/14)     | 0%<br>(0/2)            |
| Disease severity                                                                                   | Mild              | Mild              | Mild             | Mild             | Mild                   |
| Number of symptoms<br>(ranges in parentheses)                                                      | 4<br>(0-6)        | 3<br>(0-5)        | 3<br>(1-6)       | 3<br>(1-5)       | 3.5<br>(3-5)           |
| Presentation to hospital %<br>(No. patients presenting to<br>hospital/No. total patient)           | 19.2%<br>(15/78)  | 3.4%<br>(1/29)    | 22.2%<br>(4/18)  | 21.4%<br>(3/14)  | 50%<br>(1/2)           |
| Duration of illness, days<br>(ranges in parentheses)                                               | 7<br>(0-19)       | 7<br>(0-19)       | 8<br>(6-21)      | 8<br>(2-14)      | 9.5<br>(2-17)          |
| The interval days between<br>symptom onset and two<br>negative RAT                                 | 8<br>(1-20)       | 9<br>(4-18)       | 8<br>(6-12)      | 9<br>(3-14)      | 8<br>(5-11)            |

Values displayed are medians, with ranges in parentheses

See also Table S1.

# Figure 1

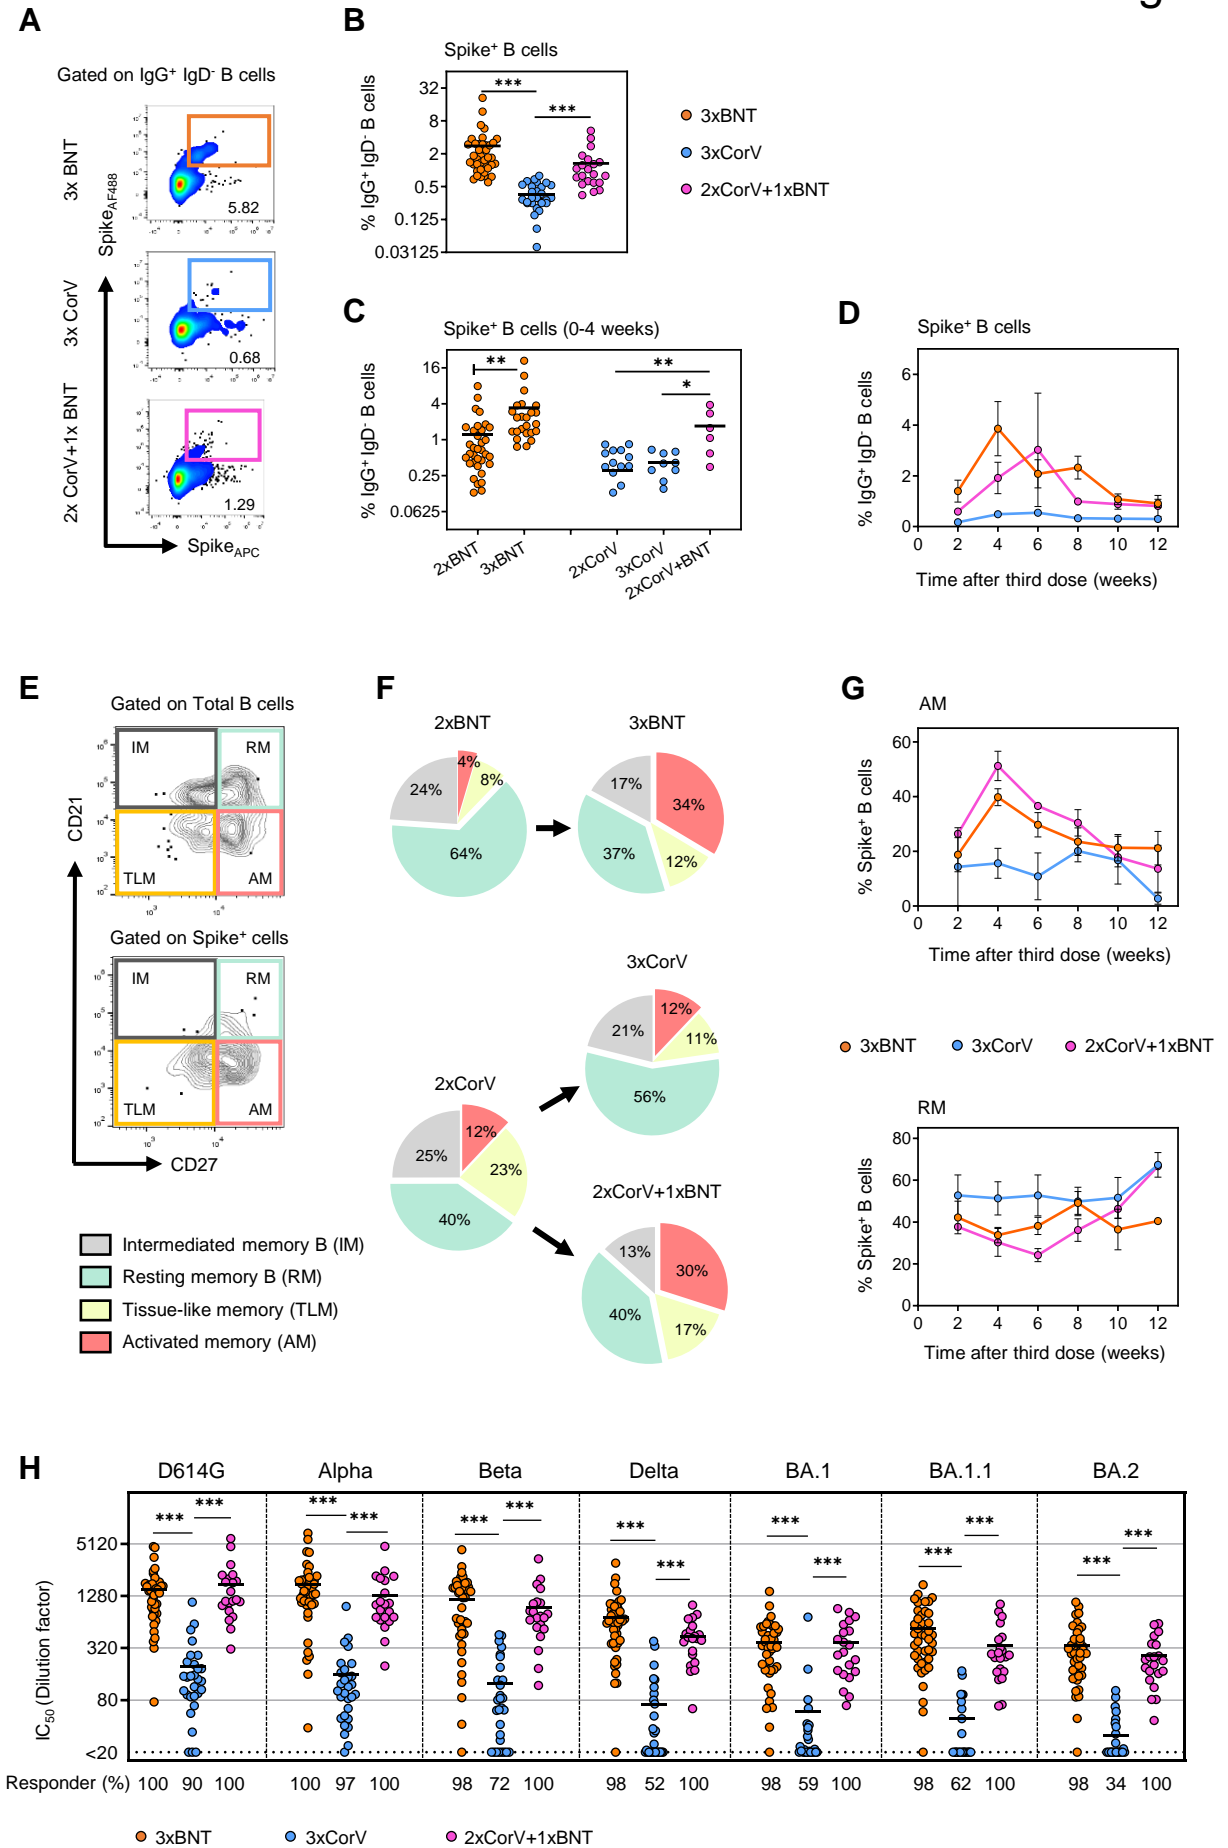

## Figure 2

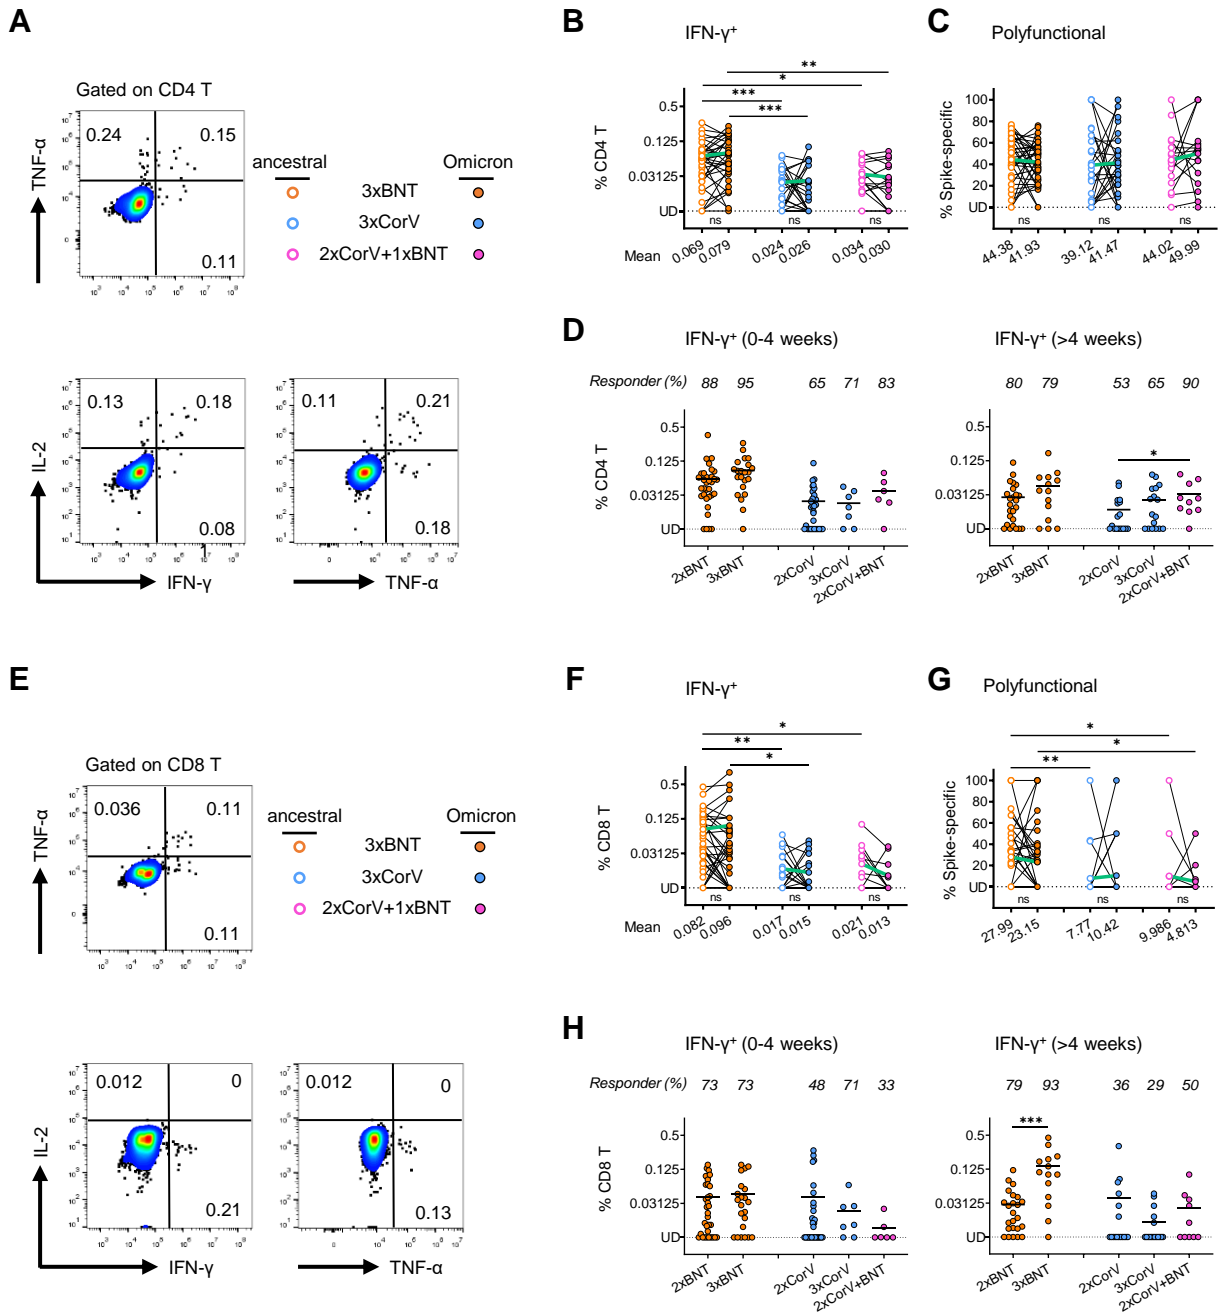

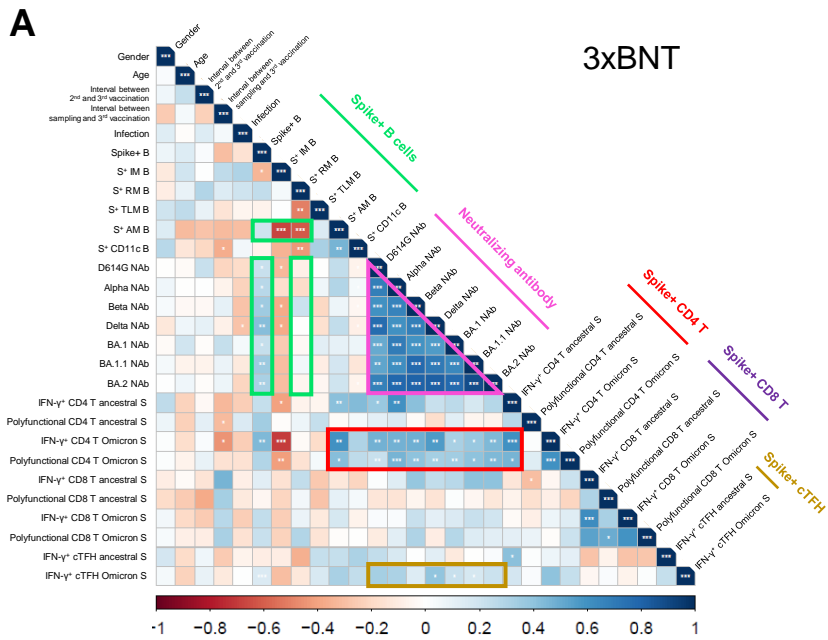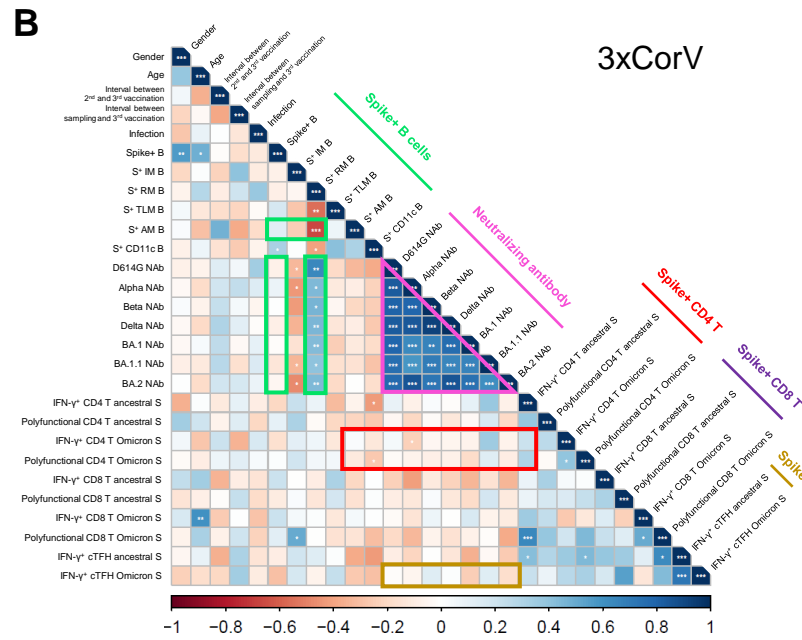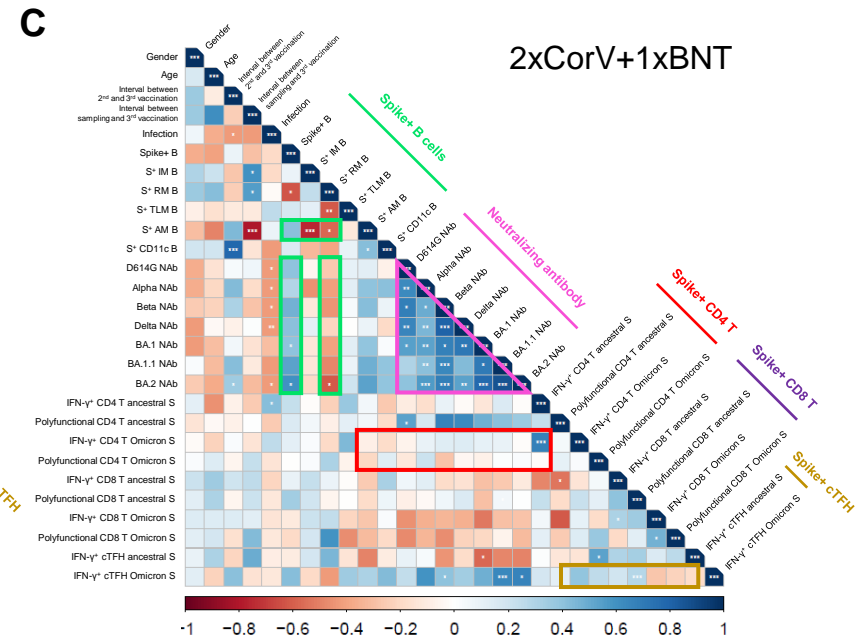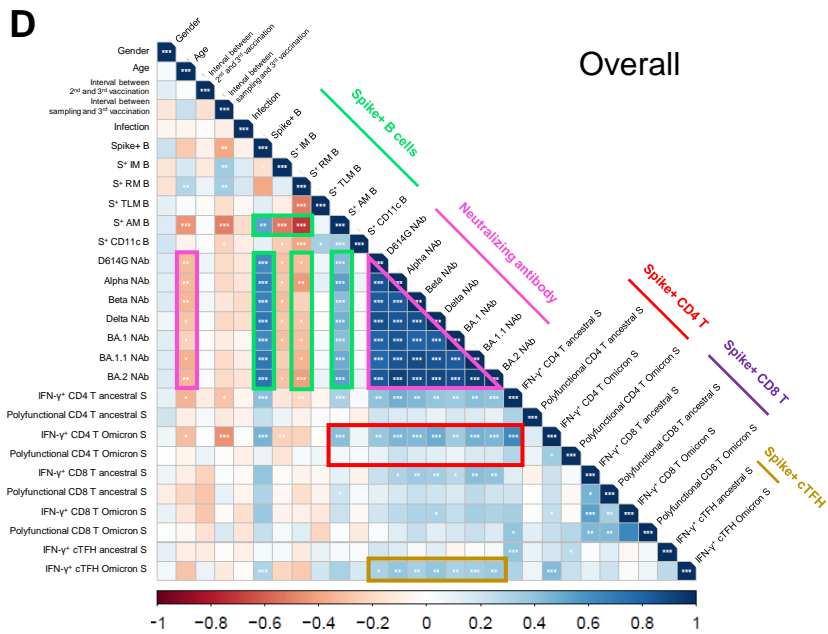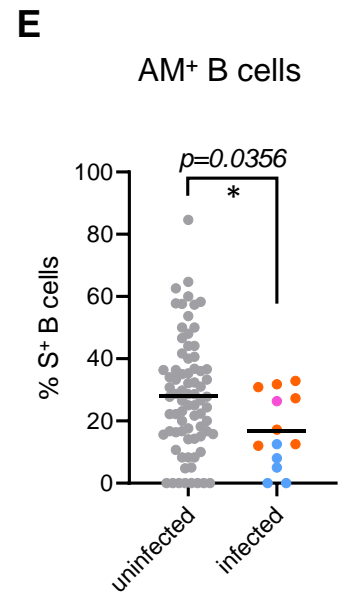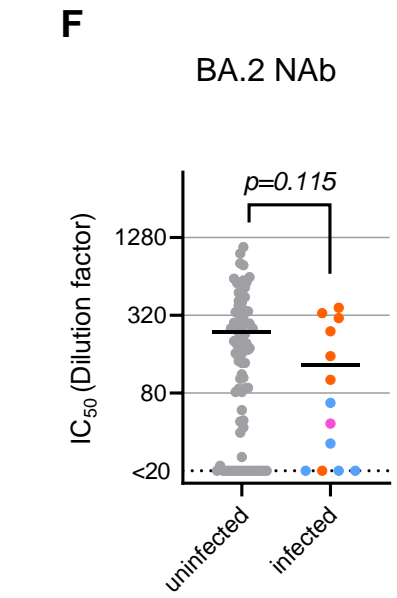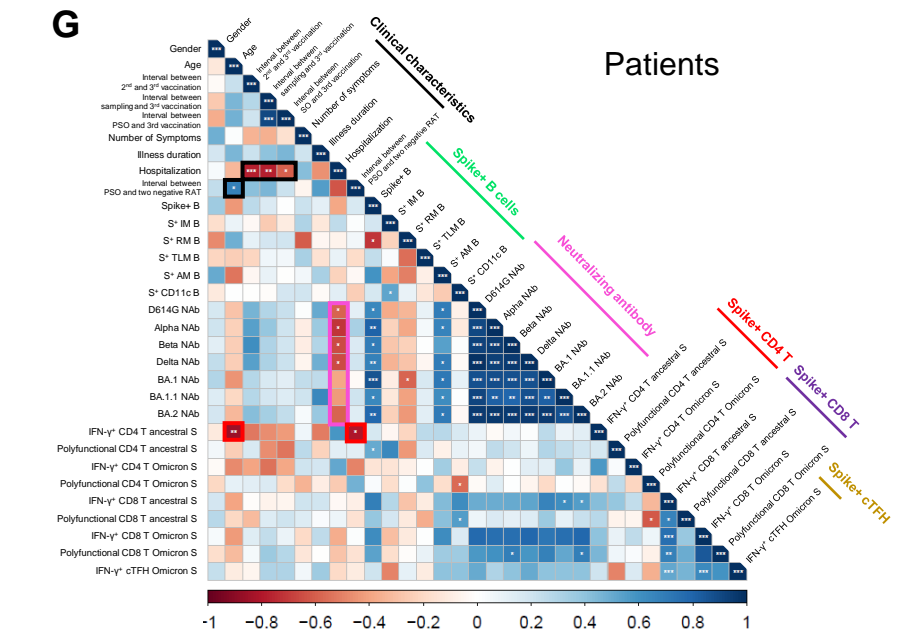

Source: https://www.biorxiv.org/content/10.1101/2022.05.09.491254v1.full.pdf
